# Supplementary material for: Solution synthesis and dielectric properties of alumina thin films: understanding the role of the organic additive in film formation
Source: Royal Society of Chemistry journal article supplement (doi:10.1039/d1dt01439k), 2021-01-01
Supplement: d1dt01439k1.pdf [file d1dt01439k1.pdf]

**Solution synthesis and dielectric properties of alumina thin films:  
Understanding the role of the organic additive in film formation.**

Rudolf C. Hoffmann<sup>1</sup>, Maciej O. Liedke<sup>2</sup>, Maik Butterling<sup>2</sup>, Andreas Wagner<sup>2</sup>,  
Vanessa Trouillet<sup>3</sup>, and Jörg J. Schneider<sup>1\*</sup>

<sup>1</sup>Eduard-Zintl-Institut für Anorganische und Physikalische Chemie, Technische Universität  
Darmstadt, Alarich-Weiss-Straße 12, 64287 Darmstadt, Germany

<sup>2</sup>Institute of Radiation Physics, Helmholtz-Zentrum Dresden-Rossendorf,  
Bautzner Landstraße 400, 01328 Dresden, Germany

<sup>3</sup>Institute for Applied Materials (IAM-ESS) and Karlsruhe Nano Micro Facility (KNMF),  
Karlsruhe Institute of Technology (KIT), Hermann-von-Helmholtz-Platz 1, 76344 Eggenstein-  
Leopoldshafen, Germany

$$\Phi_M = \frac{\sum n(\text{MCZ})}{\sum n(\text{ALN})} = \frac{\sum n(\text{C}_2\text{H}_6\text{N}_2\text{O}_2)}{\sum n(\text{AlN}_3\text{O}_9)} = \frac{10}{15} = 0.67$$

**Scheme 1:** Calculation of  $\Phi_M$  using the valencies for the different elements according to *Jain et al.*, i.e. Al (-3), C (-4), H (-1), N ( $\pm 0$ ), O (+2).

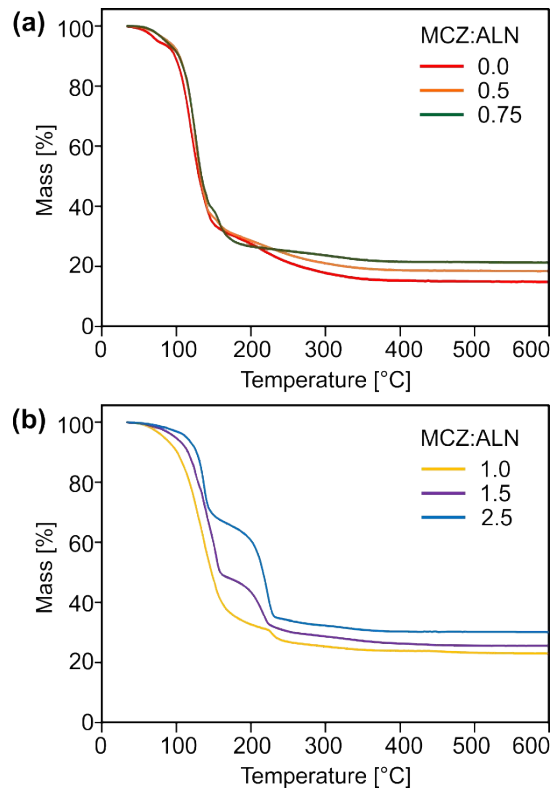

**Figure 1:** Thermogravimetric mass loss curves of precursor mixtures containing various MCZ:ALN ratios.

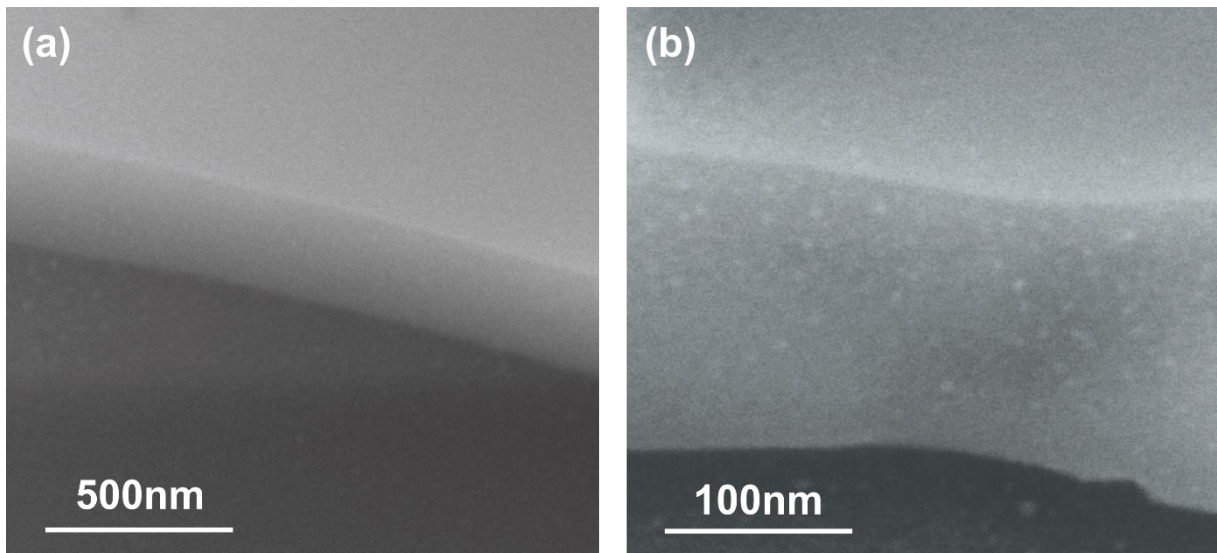

**Figure 2:** SEM micrographs depicting a cross section of an alumina film on a silicon substrate obtained from spincoating of the precursor mixture (ALN 0.4 M, MCZ:ALN = 2.5) and annealing at 450 °C. (a) and (b) present different magnifications.

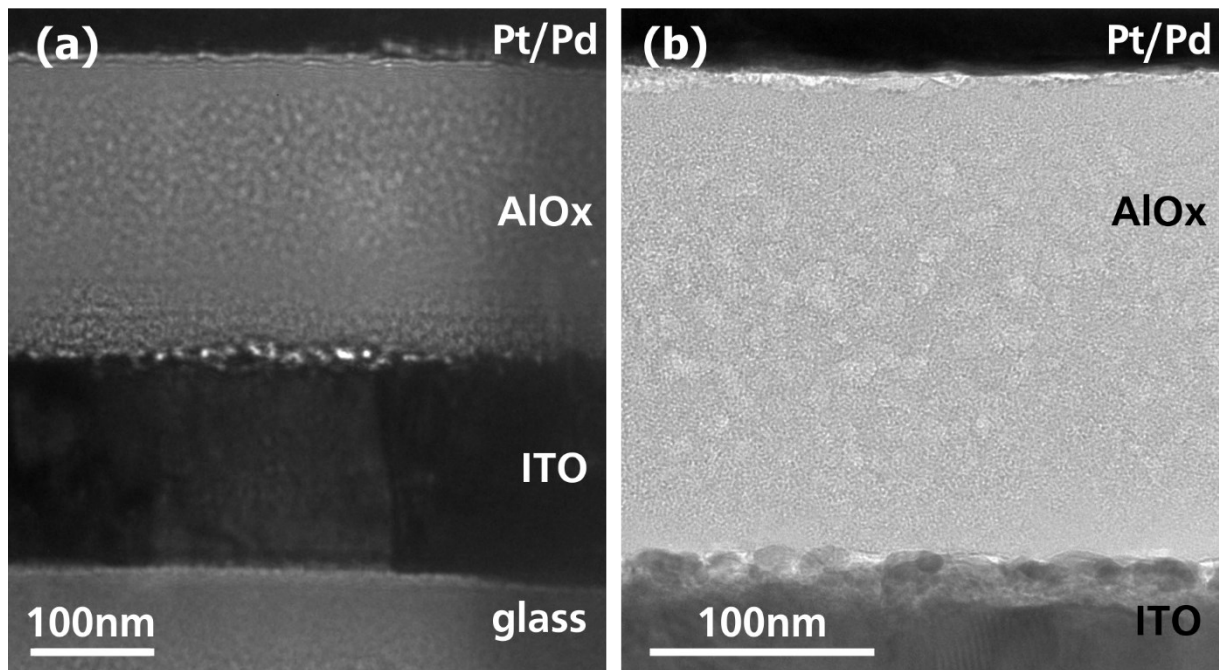

**Figure 3:** HRTEM images depicting a cross section of an alumina film on a ITO/glass substrate obtained from spincoating of the precursor mixture (ALN 0.4 M, MCZ:ALN = 2.5) and annealing at 450 °C. The roughness at the interfaces is probably an artifact from FIB preparation and due to delamination. (a) and (b) present different magnifications.

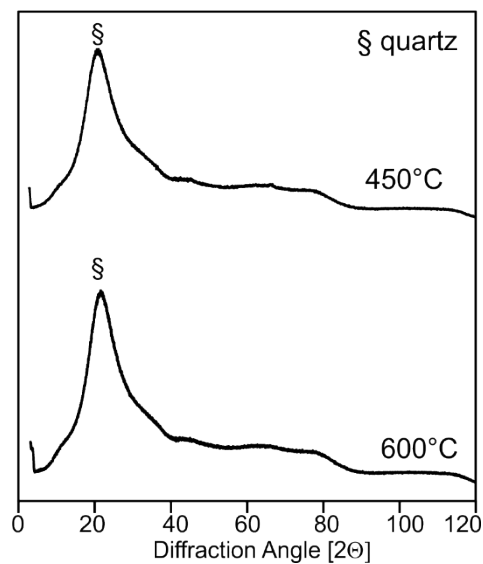

**Figure 4:** X-Ray diffractograms obtained from spincoating of the precursor mixture (ALN 0.4 M, MCZ:ALN = 2.5) on quartz and annealing at various temperatures.

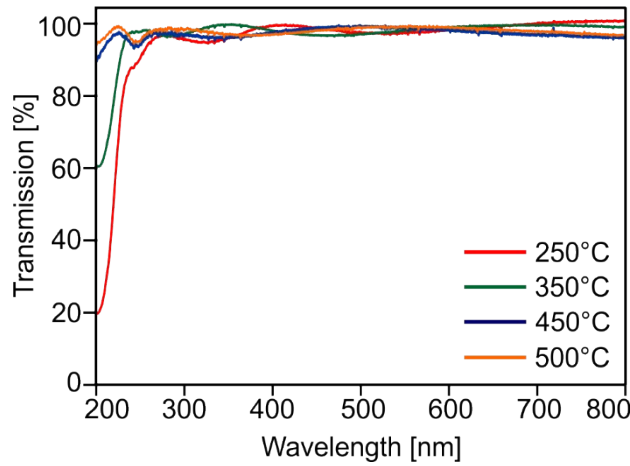

**Figure 5:** UV/VIS spectra obtained from spincoating of the precursor mixture (ALN 0.4 M, MCZ:ALN = 2.5) on quartz and annealing at various temperatures.

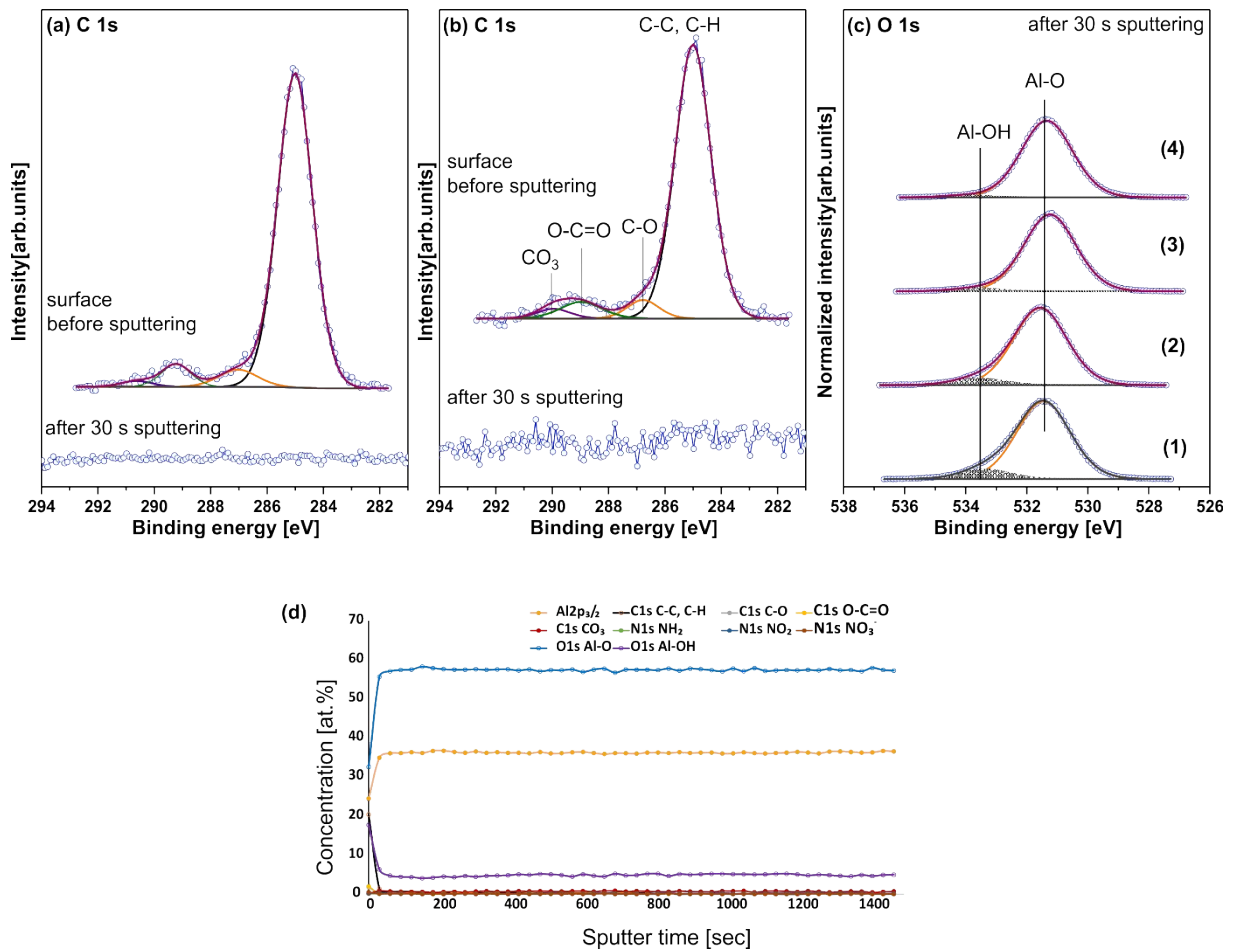

**Figure 6:** XPS spectra depicting (a) C1s region of (3), (b) C1s region of (4), (c) comparison of O1s signals of samples (1)-(4) as well as (d) depth profile of (1) showing the behaviour of relevant contributions of various elements (Al, O, C and N).

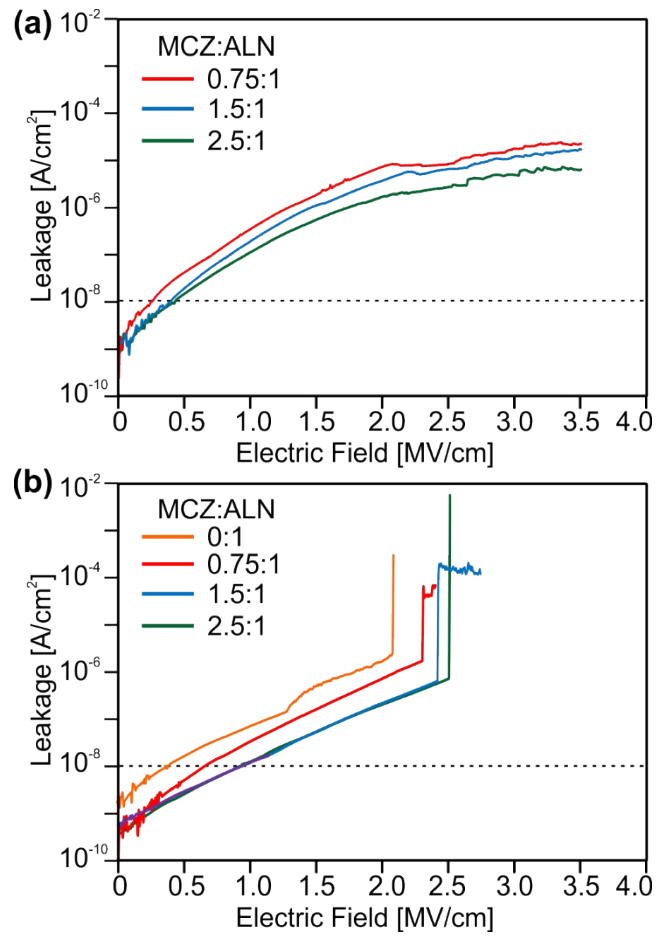

**Figure 7:** Typical breakthrough curves of films from precursor mixtures (ALN 0.4 M) with various MCZ:ALN ratios. Coatings obtained from spincoating of (a) 3 layers (~110 nm) and (b) 4 layer (~145 nm).

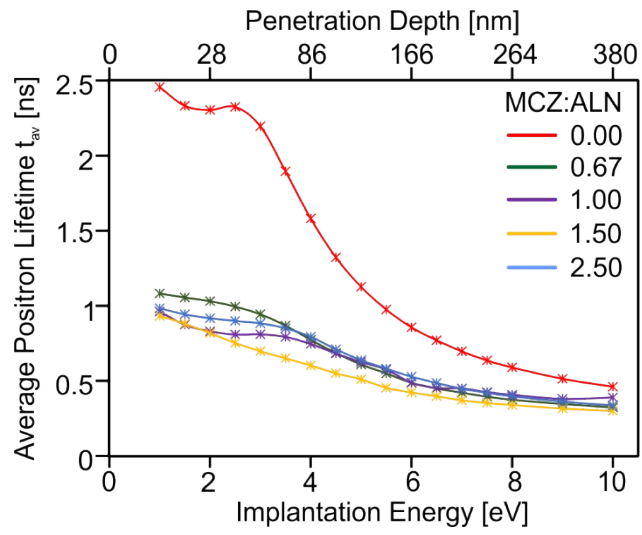

**Figure 8:** Positron lifetimes as a function of implantation energy of alumina films on silicon substrates obtained from precursor mixtures with various MCZ:ALN ratios.

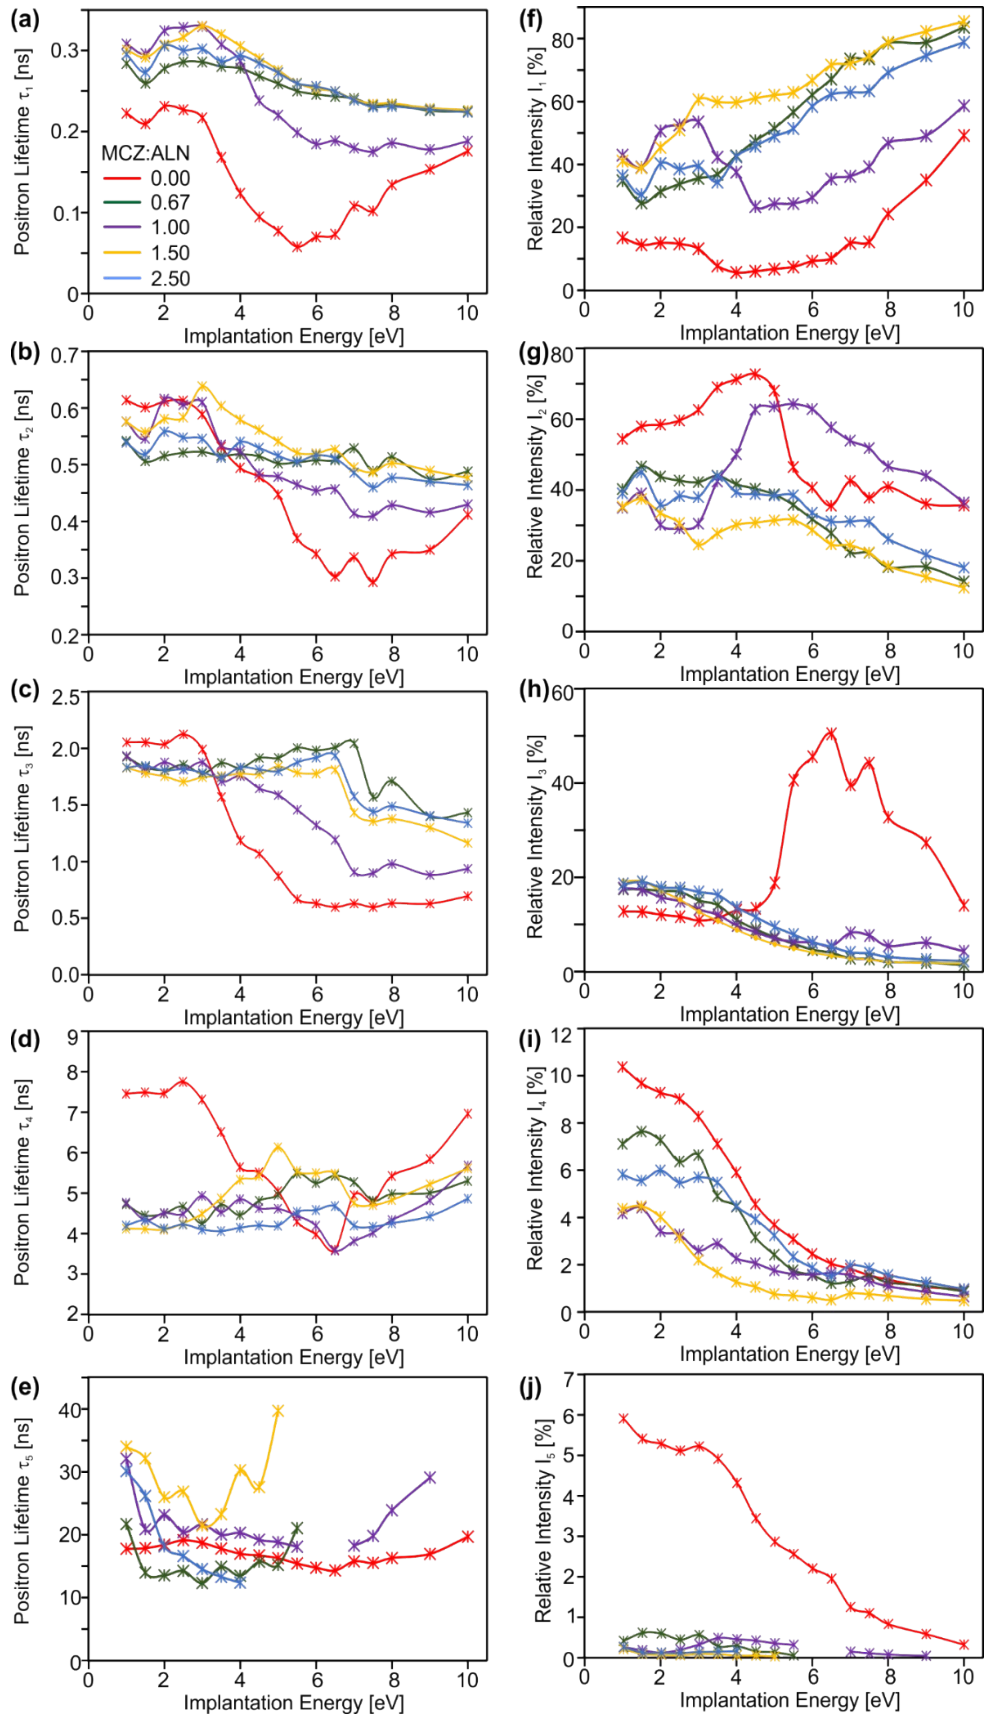

**Figure 9:** (a-e) Positron lifetime components as a function of implantation energy of alumina films on silicon substrates obtained from precursor mixtures with various MCZ:ALN ratios. (g-j) Corresponding relative intensities.
